# Supplementary material for: Bioelectrical Impedance Analysis Derived-Phase Angle as a Pragmatic Tool to Detect Protein Energy Wasting among Multi-Ethnic Hemodialysis Patients
Source: MDPI journal article supplement (doi:10.3390/diagnostics11101745), 2021-09-23
Supplement: s1 [file s1]

**Supplementary Material Table S2.** Comparison of PhA across Patients' Characteristics (n = 152).

| Variable                  | PhA (°)                    | p-Value |
|---------------------------|----------------------------|---------|
| Age (years)               |                            | <0.001  |
| 18-30                     | 5.17 ± 0.71 <sup>a</sup>   |         |
| 31-40                     | 4.91 ± 0.82 <sup>b</sup>   |         |
| 41-50                     | 4.75 ± 0.83 <sup>c</sup>   |         |
| 51-60                     | 4.31 ± 0.92                |         |
| > 60                      | 3.93 ± 0.81 <sup>abc</sup> |         |
| Gender                    |                            | <0.001  |
| Male                      | 4.62 ± 0.82 <sup>a</sup>   |         |
| Female                    | 3.92 ± 0.88 <sup>a</sup>   |         |
| Ethnicity                 |                            |         |
| Malay                     | 4.49 ± 0.96 <sup>a</sup>   | 0.012   |
| Chinese                   | 4.04 ± 0.85 <sup>a</sup>   |         |
| Indian                    | 4.07 ± 0.68                |         |
| Education level           |                            | 0.024   |
| Primary                   | 3.98 ± 0.77 <sup>a</sup>   |         |
| Secondary                 | 4.35 ± 0.96                |         |
| Tertiary                  | 4.52 ± 0.92 <sup>a</sup>   |         |
| Marital status            |                            | 0.094   |
| Single                    | 4.65 ± 0.99                |         |
| Married                   | 4.25 ± 0.90                |         |
| Employment                |                            | <0.001  |
| Employed                  | 4.75 ± 0.93 <sup>a</sup>   |         |
| Unemployed                | 4.13 ± 0.86 <sup>a</sup>   |         |
| Monthly income            |                            | 0.051   |
| ≤ RM 1000                 | 4.14 ± 0.85                |         |
| > RM 1000                 | 4.43 ± 0.96                |         |
| No of comorbidities       |                            | 0.020   |
| None                      | 4.34 ± 1.03                |         |
| One                       | 4.59 ± 0.96 <sup>a</sup>   |         |
| Two                       | 4.17 ± 0.81                |         |
| ≥ Three                   | 4.03 ± 0.86 <sup>a</sup>   |         |
| Dialysis vintage (months) |                            | 0.356   |
| < 12                      | 4.38 ± 1.37                |         |
| 12-48                     | 4.41 ± 0.87                |         |
| > 48                      | 4.19 ± 0.91                |         |
| Dialysis adequacy (Kt/V)  |                            | 0.897   |
| < 1.2                     | 4.27 ± 0.77                |         |
| ≥ 1.2                     | 4.30 ± 0.95                |         |

Data are expressed as mean ± SD; Data were analysed using independent t-test and one-way ANOVA;

<sup>a,b,c</sup> Data shared the same superscript indicates that they are significant from each other.
