# Supplementary material for: Bioelectrical Impedance Analysis Derived-Phase Angle as a Pragmatic Tool to Detect Protein Energy Wasting among Multi-Ethnic Hemodialysis Patients
Source: MDPI journal article supplement (doi:10.3390/diagnostics11101745), 2021-09-23
Supplement: s1 [file s1]

**Supplementary Material Table S3.** Correlations between PhA with PEW Criteria and Body Composition in HD Patients (n = 152).

| Categories                      | <i>r</i> | <i>p</i> -Value |
|---------------------------------|----------|-----------------|
| Body weight and fat (body mass) |          |                 |
| BMI (kg/m <sup>2</sup> )        | 0.175    | 0.031           |
| BF (%)                          | -0.382   | <0.001          |
| Unintentional weight loss (%)   | 0.093    | 0.255           |
| Muscle mass                     |          |                 |
| MAMC (cm)                       | 0.444    | <0.001          |
| Serum creatinine (umol/L)       | 0.542    | <0.001          |
| Serum chemistry                 |          |                 |
| Albumin (g/L)                   | 0.283    | <0.001          |
| Cholesterol (mmol/L)            | 0.209    | 0.010           |
| Dietary data                    |          |                 |
| DEI (kcal/kg BW/day)            | 0.074    | 0.362           |
| DPI (g/kg BW/day)               | 0.057    | 0.484           |
| Body Composition                |          |                 |
| OH (L)                          | -0.420   | <0.001          |
| LTI (kg/m <sup>2</sup> )        | 0.718    | <0.001          |
| FTI (kg/m <sup>2</sup> )        | -0.160   | 0.048           |
| ICW (L)                         | 0.658    | <0.001          |
| ECW (L)                         | 0.251    | 0.002           |
| BCM (kg)                        | 0.690    | <0.001          |

Data was analysed using Pearson Product-Moment Correlation; Abbreviations: BMI, body mass index; BF, body fat; MAMC, mid-arm muscle circumference; DEI, dietary energy intake; DPI, dietary protein intake; BW, body weight; OH, overhydration; LTI, lean tissue index; FTI, fat tissue index; ICW, intracellular water; ECW, extracellular water; BCM, body cell mass.
