# Supplementary material for: Bioelectrical Impedance Analysis Derived-Phase Angle as a Pragmatic Tool to Detect Protein Energy Wasting among Multi-Ethnic Hemodialysis Patients
Source: MDPI journal article supplement (doi:10.3390/diagnostics11101745), 2021-09-23
Supplement: s1 [file s1]

**Supplementary Material Table S4.** Comparisons of Previous Studies using PhA for PEW Diagnosis.

| Author                    | Country | Study Design         | Sample Size | Age (years) | Female, n (%) | BIA Model    | BIA Type         | PhA Cut-Off (°) | AUC   | Sensitivity (%) | Specificity (%) |
|---------------------------|---------|----------------------|-------------|-------------|---------------|--------------|------------------|-----------------|-------|-----------------|-----------------|
| Ruperto et al., 2014      | Spain   | Cross-sectional      | 80          | 68.0 ± 14.4 | 28 (35.0)     | BIVA-101     | Single frequency | 4.00            | NA    | NA              | NA              |
| Tan et al., 2019          | China   | Cross-sectional      | 173         | 58.0 ± 11.8 | 78 (45.1)     | InBody S10   | Multi-frequency  | 4.60            | 0.870 | 86.4            | 76.3            |
| Leal-Escobar et al., 2019 | Mexico  | Cross-sectional      | 69          | 36.5 ± 13.4 | 36 (52.0)     | InBody S10   | Multi-frequency  | 4.64            | 0.776 | 77.7            | 76.1            |
| Saitoh et al., 2020       | Japan   | Retrospective cohort | 116         | 64.0 ± 12.0 | 41 (35.0)     | Seca mBCA515 | Multi-frequency  | 3.70            | 0.718 | NA              | NA              |
| Zhou et al., 2021         | China   | Cross-sectional      | 64          | 59.6 ± 12.6 | 31 (48.4)     | InBody 770   | Multi-frequency  | 4.45            | 0.749 | 83.3            | 37.5            |

Abbreviations: BIA, bioelectrical impedance analysis; AUC, area under the curve; NA, not available
