# Supplementary material for: Bioelectrical Impedance Analysis Derived-Phase Angle as a Pragmatic Tool to Detect Protein Energy Wasting among Multi-Ethnic Hemodialysis Patients
Source: MDPI journal article supplement (doi:10.3390/diagnostics11101745), 2021-09-23
Supplement: s1 [file s1]

**Supplementary Material Table S1.** Criteria Proposed by ISRNM to Diagnose PEW.

---

**Criteria**

---

**1. Body weight and fat (body mass)**

Body mass index < 23kg/m<sup>2</sup>;

Body fat percentage < 10%;

Unintentional weight loss over time: 5% over 3 months or 10% over 6 months.

**2. Muscle mass**

Mid-arm muscle circumference: reduction > 10% in relation to 50th percentile of reference population;

Reduced muscle mass: 5% over 3 months or 10% over 6 months.

**3. Serum chemistry**

Serum albumin < 38 g/L;

Serum cholesterol < 2.59 mmol/L.

**4. Dietary intake**

Unintentional low dietary protein intake < 0.8 g/kg BW/day for 2 months;

Unintentional low dietary energy intake < 25 kcal/kg BW/day for 2 months.

---

Source: [2] Fouque et al.
