# Supplementary material for: Bioelectrical Impedance Analysis Derived-Phase Angle as a Pragmatic Tool to Detect Protein Energy Wasting among Multi-Ethnic Hemodialysis Patients
Source: MDPI journal article supplement (doi:10.3390/diagnostics11101745), 2021-09-23
Supplement: s1 [file s1]

**Supplementary Material Figure S3. Other Major Comorbidities (n = 152).**

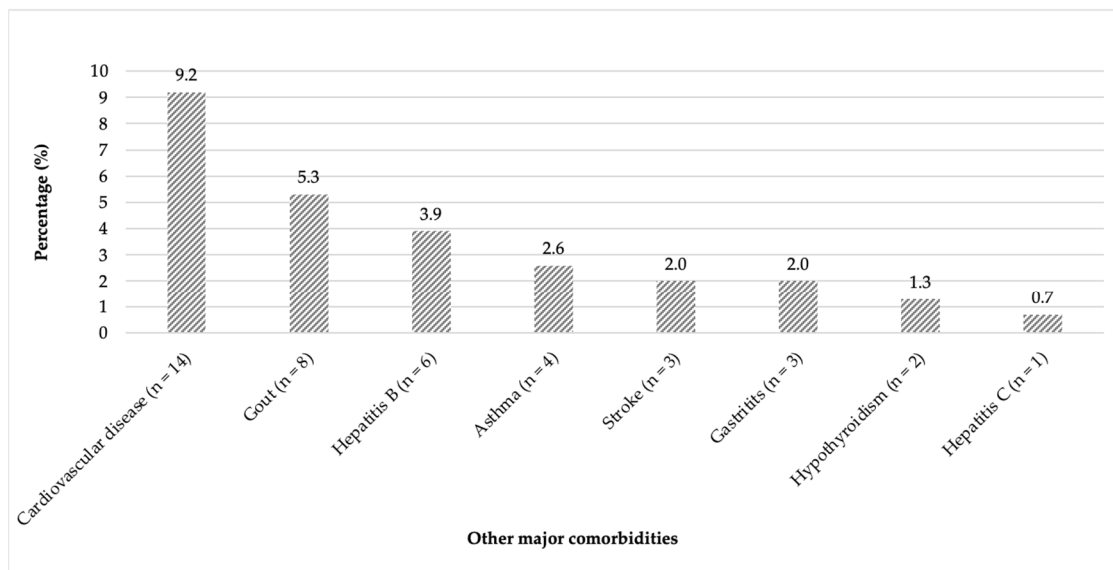

**Figure S3.** The frequency for other major comorbidities does not equal to the total number of patients because some patients have multiple comorbidities.
