# Supplementary material for: Bioelectrical Impedance Analysis Derived-Phase Angle as a Pragmatic Tool to Detect Protein Energy Wasting among Multi-Ethnic Hemodialysis Patients
Source: MDPI journal article supplement (doi:10.3390/diagnostics11101745), 2021-09-23

**Supplementary Material Figure S1.** Body Composition Measurement using Fresenius Bioelectrical Impedance Spectroscopy.

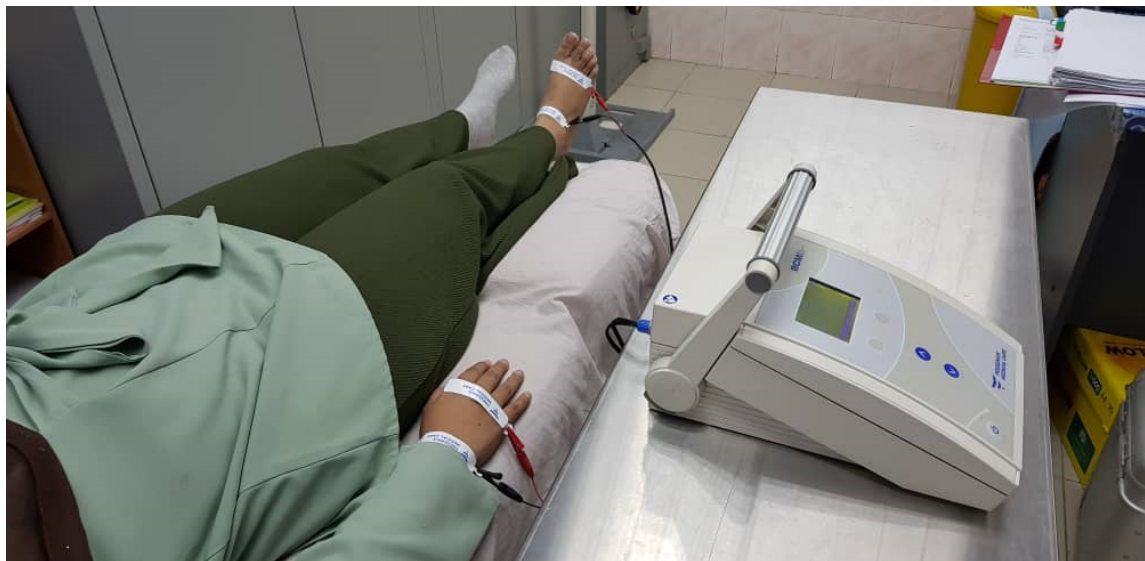

Supplement: s1 [file s1]
