# Supplementary material for: Bioelectrical Impedance Analysis Derived-Phase Angle as a Pragmatic Tool to Detect Protein Energy Wasting among Multi-Ethnic Hemodialysis Patients
Source: MDPI journal article supplement (doi:10.3390/diagnostics11101745), 2021-09-23
Supplement: s1 [file s1]

**Supplementary Material Table S5.** Sub-group Analysis for Diagnostic Accuracy of PhA according to Ethnicity to detect PEW in HD Patients (n = 152).

| <b>Ethnicity</b> | <b>PhA Cut-Off (°)</b> | <b>adjAUC</b> | <b>Sensitivity (%)</b> | <b>Specificity (%)</b> | <b><i>p</i>-Value</b> |
|------------------|------------------------|---------------|------------------------|------------------------|-----------------------|
| Malay (n = 84)   | 4.26                   | 0.744         | 64.3                   | 60.0                   | <0.001                |
| Chinese (n = 50) | 3.85                   | 0.692         | 61.5                   | 67.6                   | 0.028                 |
| Indian (n = 18)  | 4.14                   | 0.785         | 80.0                   | 53.8                   | 0.009                 |

Abbreviations: PhA, phase angle; adjAUC, area under the curve adjusted for age, dialysis vintage, comorbidities, measurement quality, and overhydration. Data was analysed using Receiver Operating Characteristics curve analysis.
