# Supplementary figures and images for: Bioelectrical Impedance Analysis Derived-Phase Angle as a Pragmatic Tool to Detect Protein Energy Wasting among Multi-Ethnic Hemodialysis Patients
Source: MDPI journal article supplement (doi:10.3390/diagnostics11101745), 2021-09-23

**Supplementary Material Figure S2. Flowchart of Patient Recruitment.**

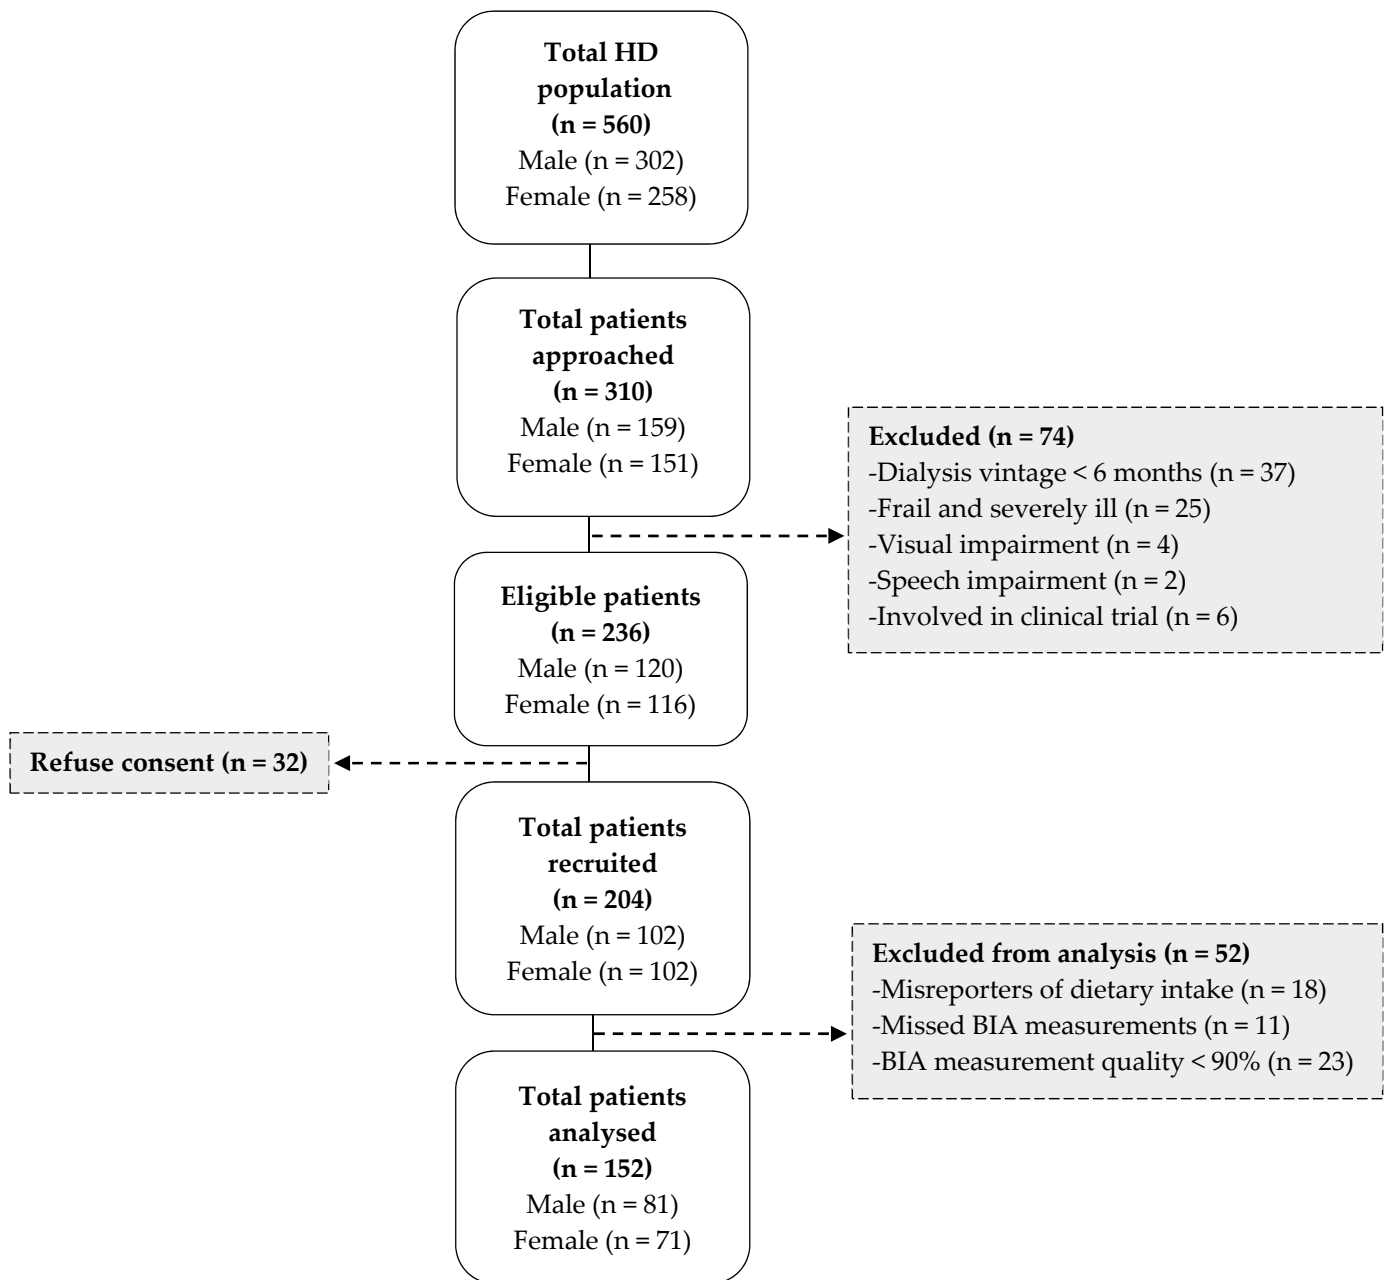

Supplement: s1 [file s1]

Supplementary Material Figure S3. Overall Model Quality.

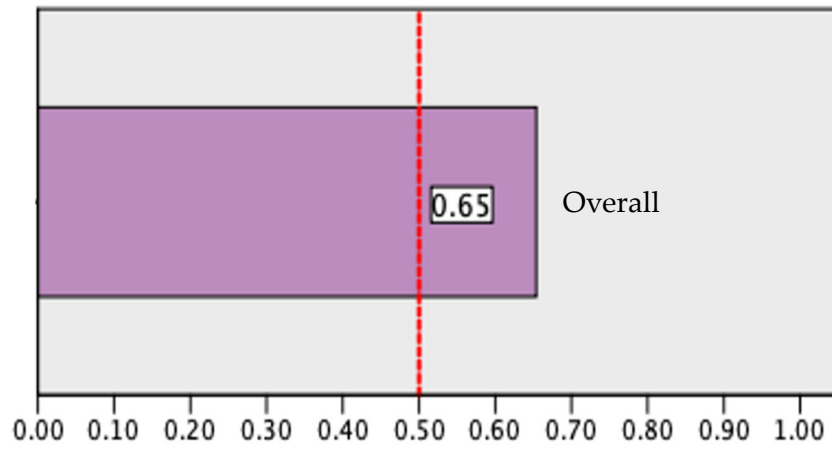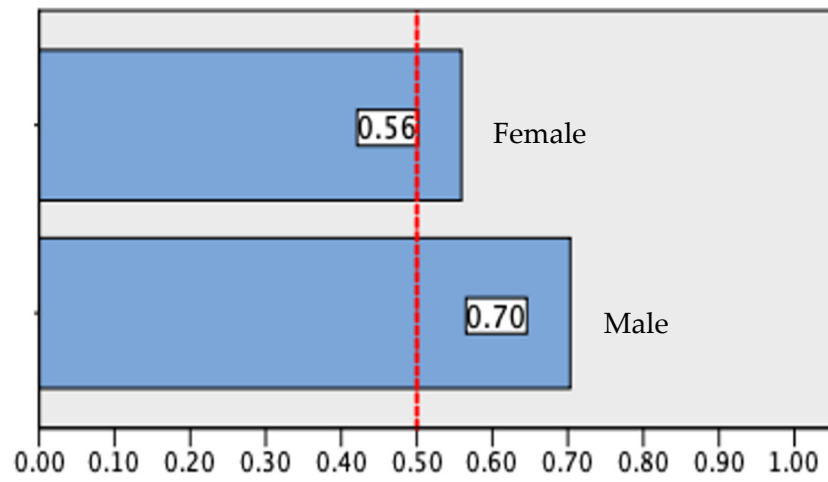

Supplement: s1 [file s1]
